# Supplementary material for: Whole slide images reflect DNA methylation patterns of human tumors
Source: PubMed Central journal article supplement (PMC7064513; doi:10.1038/s41525-020-0120-9), 2020-03-10
Supplement: 41525_2020_120_MOESM2_ESM.pdf [file 41525_2020_120_MOESM2_ESM.pdf]

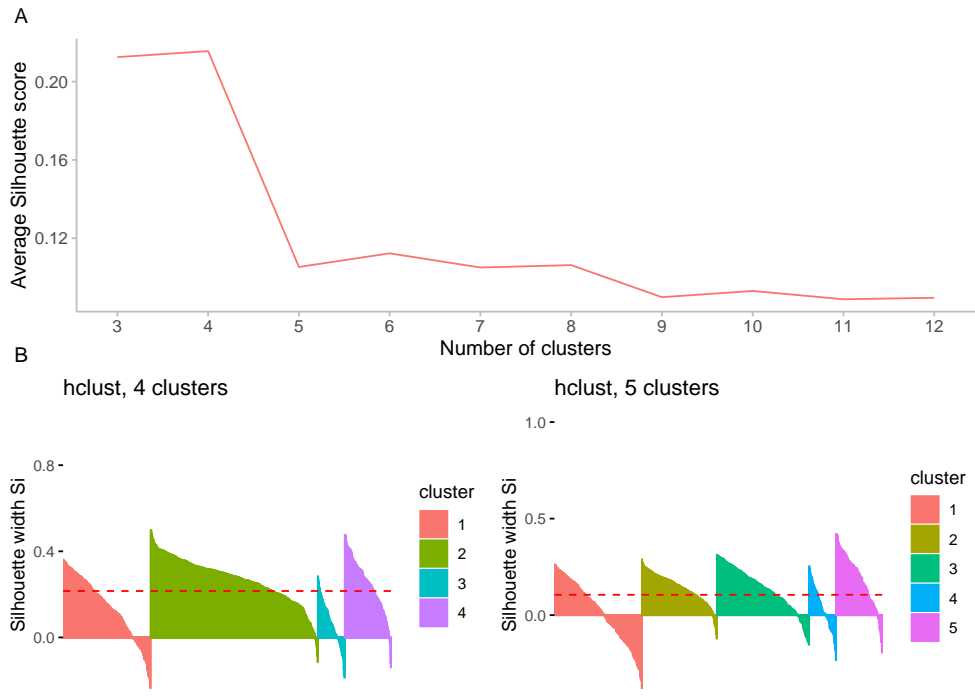

Supplementary Figure 1: Silhouette analysis for clustering in the glioma cohort.

| <b>List of features</b>                  |
|------------------------------------------|
| cell voronoi area                        |
| cellularity                              |
| cytoplasm background intensity           |
| cytoplasm contrast                       |
| cytoplasm gradient                       |
| cytoplasm intensity                      |
| cytoplasm intensity total                |
| edge length                              |
| nucleus area                             |
| nucleus aspect ratio                     |
| nucleus background intensity             |
| nucleus bending energy s1                |
| nucleus contrast                         |
| nucleus curvature s1                     |
| nucleus deviation from polygon convexity |
| nucleus gradient                         |
| nucleus intensity                        |
| nucleus intensity total                  |
| nucleus major axis                       |
| nucleus max curvature s1                 |
| nucleus minor axis                       |
| nucleus orientation                      |
| nucleus perimeter                        |
| nucleus texture feature 0                |
| nucleus texture feature 1                |
| nucleus texture feature 10               |
| nucleus texture feature 11               |
| nucleus texture feature 2                |
| nucleus texture feature 3                |
| nucleus texture feature 4                |
| nucleus texture feature 5                |
| nucleus texture feature 6                |
| nucleus texture feature 7                |
| nucleus texture feature 8                |
| nucleus texture feature 9                |

Supplementary Table 1: Morphometric features extracted from histopathology images of tumors
